# Supplementary material for: Myocardial Work in Middle-Aged Adults with Overweight and Obesity: Associations with Sex and Central Arterial Stiffness
Source: MDPI journal article supplement (doi:10.3390/jcm12175676), 2023-08-31
Supplement: s1 [file s1]

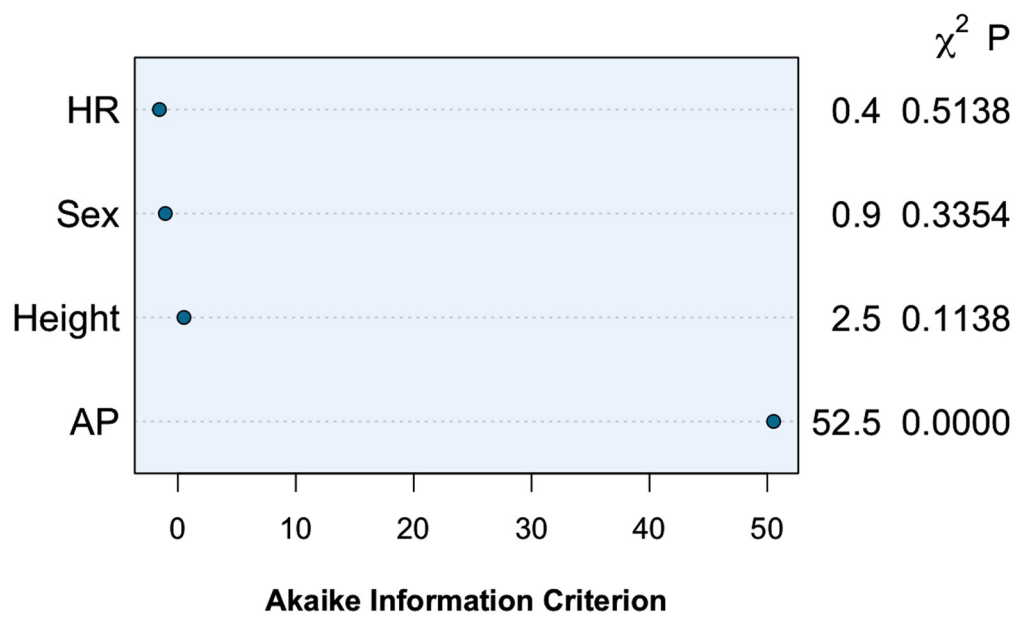

**Figure S1.** Graphical presentation of the relative importance of covariables of GWI. HR, heart rate; AP, augmentation pressure.
